# Supplementary material for: Tracking energy transfer from excited to accepting modes: application to water bend vibrational relaxation
Source: Royal Society of Chemistry journal article supplement (doi:10.1039/c2cp23555b), 2012-01-01
Supplement: c2cp23555b.pdf [file c2cp23555b.pdf]

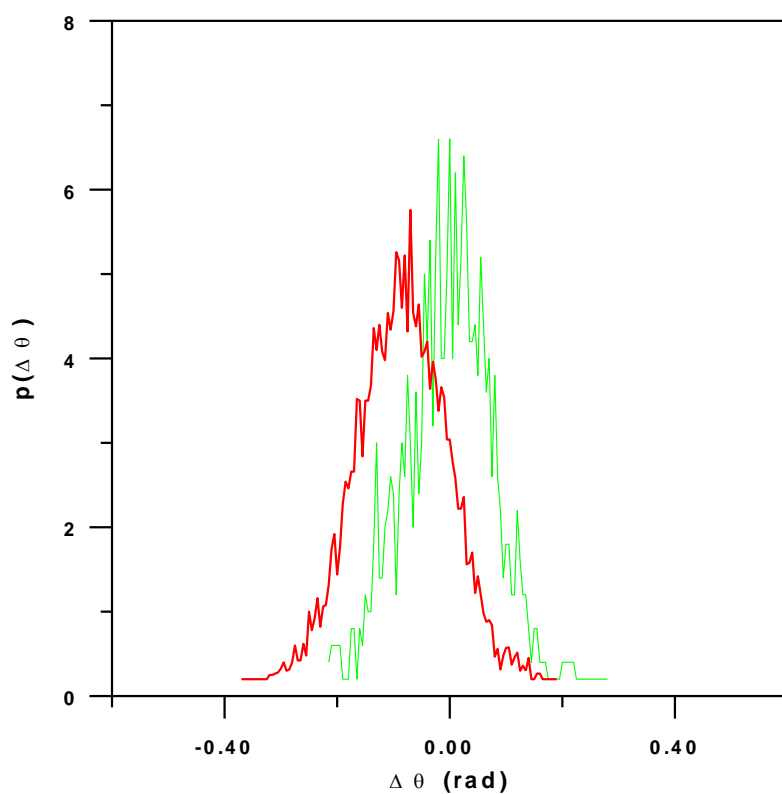

Green line: distribution of sampled angles for nonequilibrium trajectories obtained in Ref. 17, where the central water molecule is kept rigid during equilibration; red line: distribution obtained in this work from a simulation with a flexible bend. Horizontal axis denotes the deviation from the SPC/E bend angle.
